# Supplementary material for: Structural diversity and magnetic properties of five copper–organic frameworks containing one-, two-, and three-types of organic ligands
Source: Royal Society of Chemistry journal article supplement (doi:10.1039/c2dt32515b), 2012-11-27
Supplement: c2dt32515b.pdf [file c2dt32515b.pdf]

## Supporting Information

### Structural diversity and magnetic property of five copper-organic frameworks containing one-, two-, and three-types of organic ligands†

Bo Shen, Peng-Fei Shi, Yin-Ling Hou, Fan-Fan Wan, Dong-Liang Gao, and Bin Zhao\*

*Department of Chemistry, Key Laboratory of Advanced Energy Material Chemistry, MOE, and TKL of Metal and Molecule Based Material Chemistry, Nankai University, Tianjin 300071, China.*

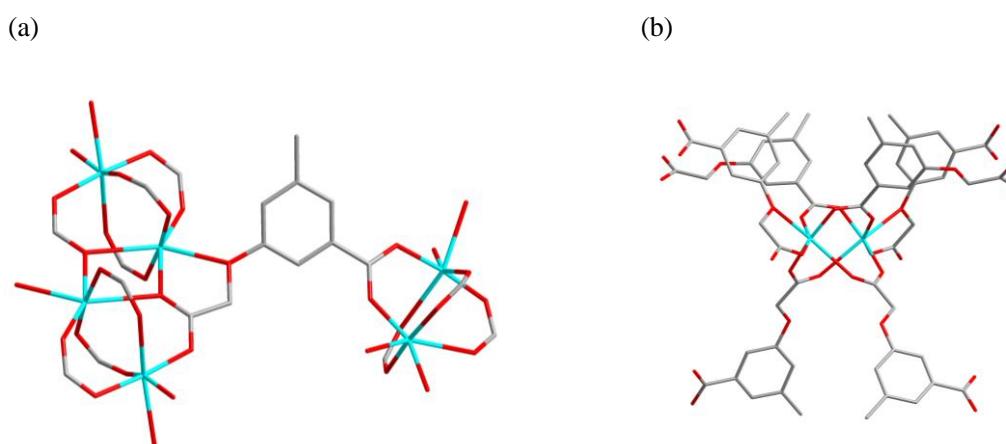

**Figure S1.** (a) In **1**, one  $\text{CMA}^{2-}$  connects three paddle-wheel units; (b) One paddle-wheel unit connects six  $\text{CMA}^{2-}$  ligands.

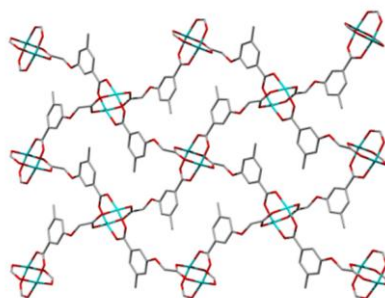

**Figure S2.** 2D layer structure of **2** consists of  $\text{Cu}^{2+}$  and  $\text{CMA}^{2-}$ . (Cu: cyan; C: grey; O: red; N: blue)

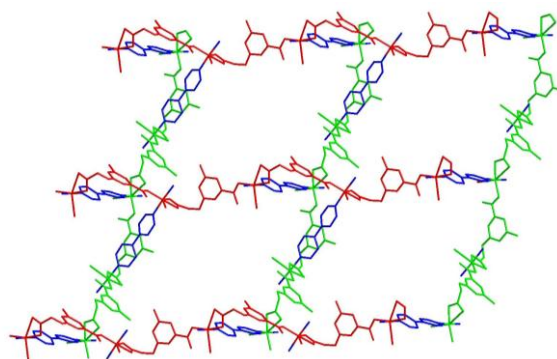

**Figure S3.** The interconnection between layers in **3** (Layer A: red; layer B: green; bpy: blue)

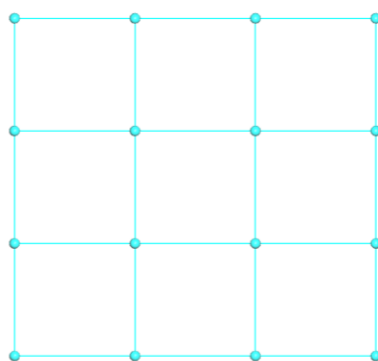

**Figure S4.** Topological structure of **4**.

(a)

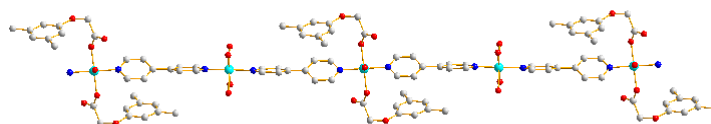

(b)

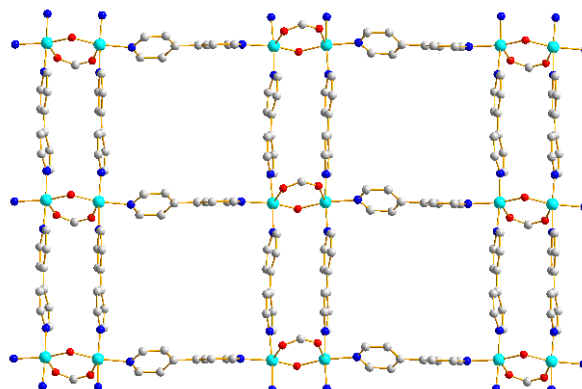

**Figure S5.** In compound **5**, (a) 1D chain along the *c* axis; (b) 2D sheet along the [001] direction.  
Cu: cyan; C: grey; O: red; N: blue.

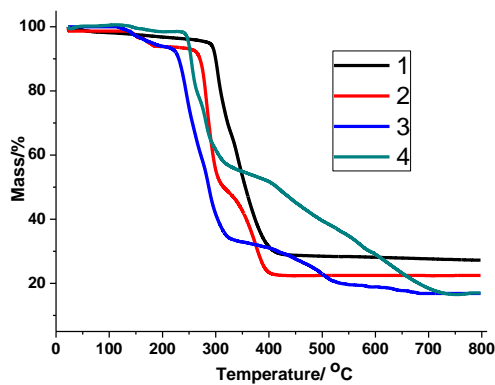

**Figure S6.** The TGA curves of **1-4**.

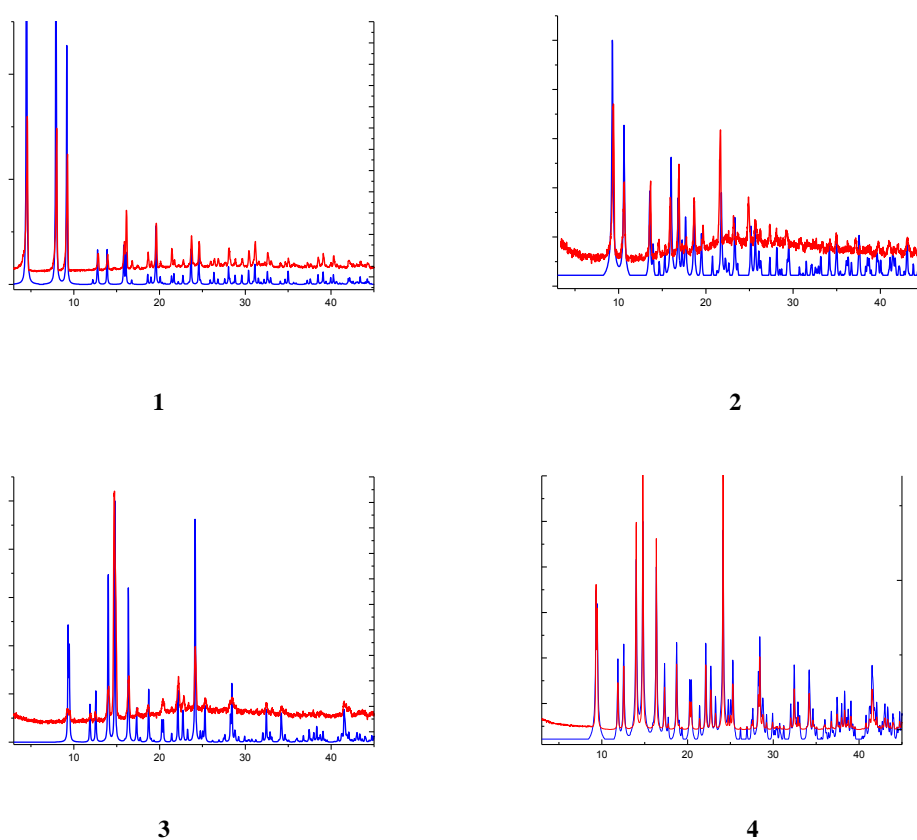

**Figure S7.** The XRPD patterns of **1-4** (red: experiment; blue: simulated)

**Crystallographic Studies** In **1**, the squeezed electron number is 98 in one cell, which is consistent with 0.8 free H<sub>2</sub>O. [ $12 \times 0.8 \times 10 = 96$ ], corresponding to the molecular formula  $\{[\text{Cu}(\text{CMA})] \cdot 0.8\text{H}_2\text{O}\}_n$ .
